# Supplementary material for: PDGFRα/PDGFRβ signaling balance modulates progenitor cell differentiation into white and beige adipocytes
Source: Oxford University Press journal article supplement (doi:10.1242/dev.155861), 2017-11-21
Supplement: dev155861supp.pdf [file dev155861supp.pdf]

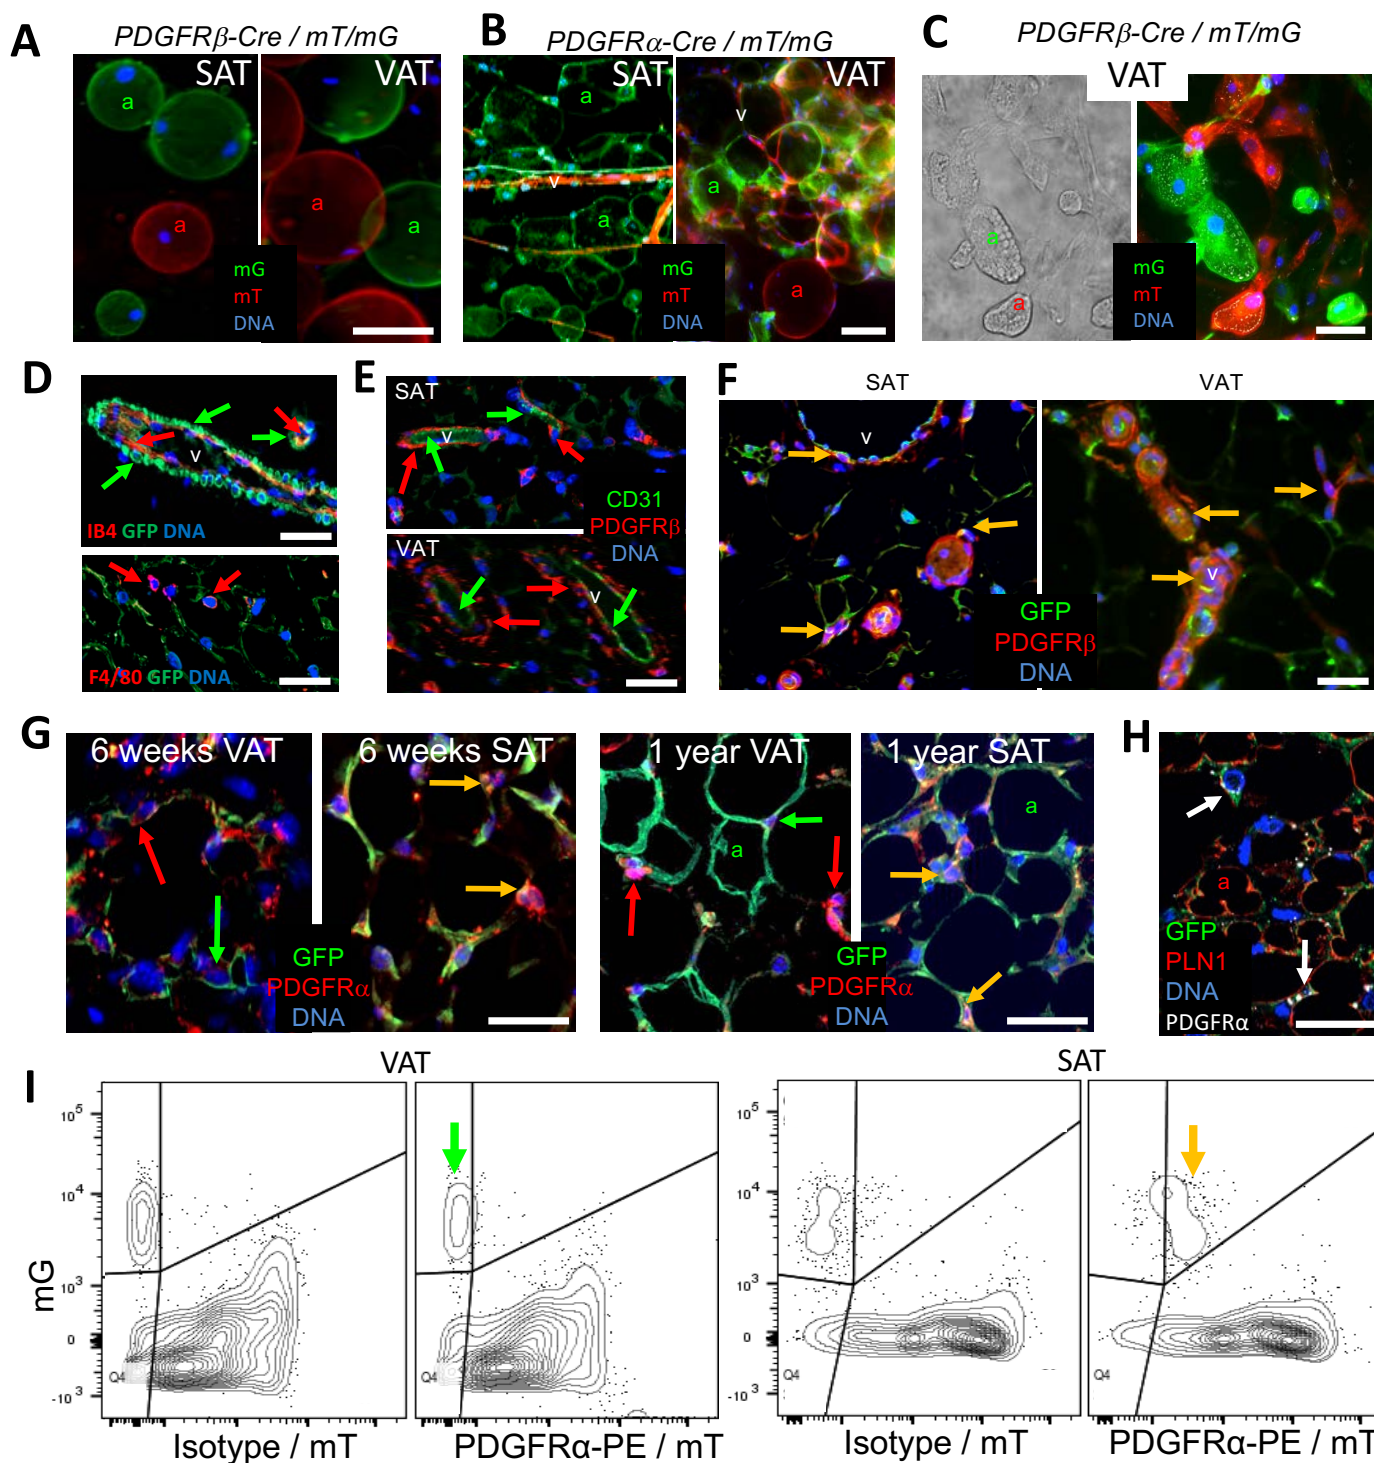

**Fig. S1. Distinct PDGFR $\beta$ <sup>+</sup> lineages generate white adipocytes in SAT and VAT.**

(A) Suspended mT<sup>+</sup> and mG<sup>+</sup> adipocytes (a) from disaggregated SAT and VAT of an adult *Pdgfr $\beta$ -Cre; mT/mG* mouse. (B) A whole mount of SAT and VAT from an adult *Pdgfra-Cre; mT/mG* mouse showing mT<sup>+</sup> and mG<sup>+</sup> adipocytes and mT<sup>+</sup> vasculature (v). (C) Cultured SVF from VAT of an adult *Pdgfr $\beta$ -Cre; mT/mG* mouse subjected to white adipogenesis induction. Note lipid droplets in mT<sup>+</sup> and mG<sup>+</sup> adipocytes. (D-H) Paraffin sections of SAT and VAT from *Pdgfr $\beta$ -Cre; mT/mG* mice. (D) F4/80 IF / Isolectin B4 staining showing perivascular mG lineage tracing and that macrophages and endothelial cells are not lineage-traced in SAT. (E) PDGFR $\beta$  / CD31 IF showing that, like *Pdgfr $\beta$ -Cre*, PDGFR $\beta$  is perivascular in SAT and VAT. (F) GFP / PDGFR $\beta$  IF confirming that perivascular PDGFR $\beta$ <sup>+</sup> cells are lineage-traced with *Pdgfr $\beta$ -Cre* in SAT and VAT. Colocalization is indicated (yellow arrows). v: blood vessels. (G) GFP / PDGFR $\alpha$  IF showing PDGFR $\alpha$  / mG colocalization in SAT and lack of PDGFR $\alpha$  / mG colocalization in VAT of 6 week-old and 1 year old mice. (H) GFP / perilipin-1 / PDGFR $\alpha$  IF showing PDGFR $\alpha$  / mG colocalization outside adipocytes in SAT. (I) Flow cytometric analysis of SVF from SAT and VAT of a *Pdgfr $\beta$ -Cre; mT/mG* mouse with anti-PDGFR $\alpha$  PE-conjugated antibody. The PDGFR $\alpha$  gate is set using the IgG-PE isotype control on SVF from C57BL/6 mice (not shown). The mG gate is set based on autofluorescence of SVF from C57BL/6 mice (not shown). Note the PDGFR $\alpha$  signal on mG<sup>+</sup> cells only in SAT (yellow arrow). In all panels, scale bar=50  $\mu$ m; nuclei are blue.

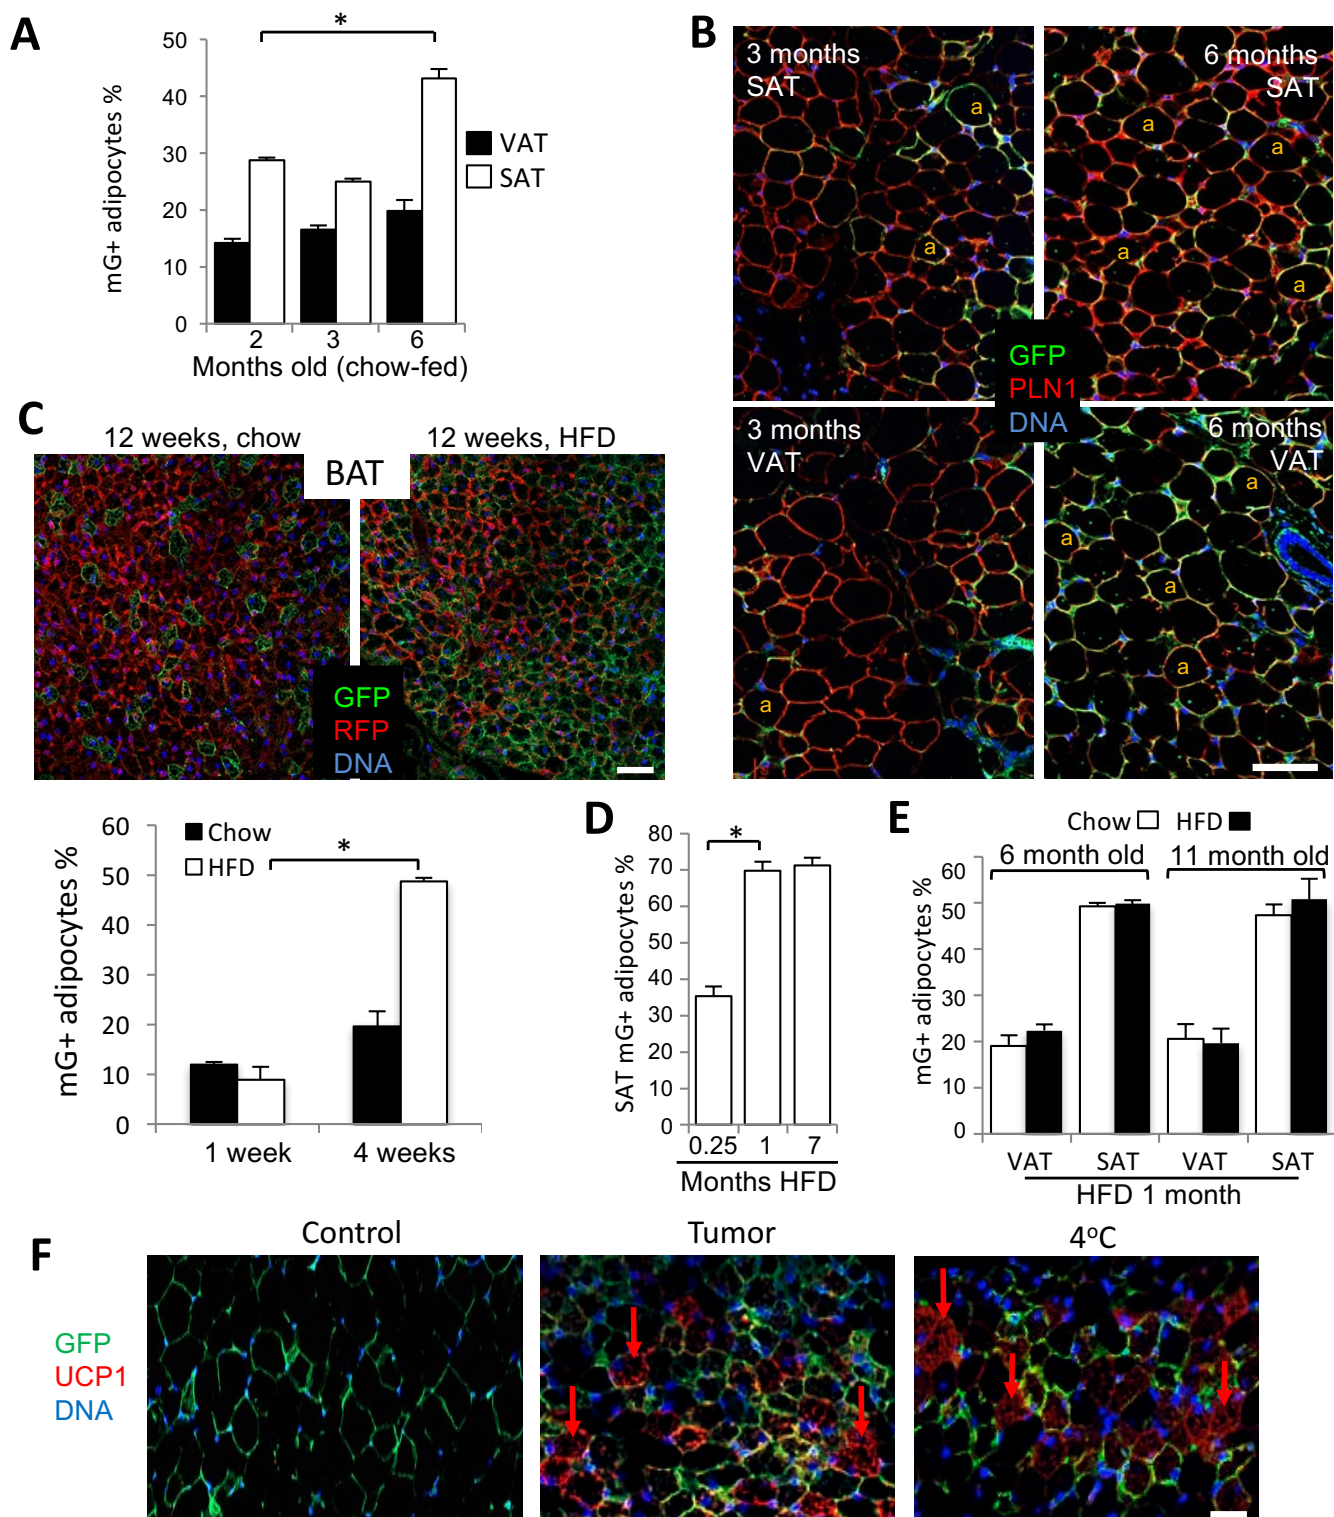

**Fig. S2. The PDGFR $\beta$ <sup>+</sup> lineage contribution to the beige adipocyte pool is minimal.**

(A) Frequency of mG<sup>+</sup> adipocytes in VAT and SAT of 2, 3, and 6 month-old *Pdgfr $\beta$ -Cre; mT/mG* mice raised on chow diet. (B) Confocal IF on paraffin sections of SAT and VAT from 3-month-old and 6-month-old *Pdgfr $\beta$ -Cre; mT/mG* mice subjected to perilipin-1 labeling adipocytes / GFP labeling ASC and adipocytes. Yellow: mG / perilipin-1 co-localization in adipocytes (a). (C) Paraffin sections of interscapular BAT from 12 week-old *Pdgfr $\beta$ -Cre; mT/mG* mice fed chow or high fat diet for 4 weeks were subjected to RFP (red) and GFP (green) IF. Below: quantification of mG<sup>+</sup> adipocyte frequency after 1 and 4 weeks of feeding. (D) Frequency of mG<sup>+</sup> adipocytes in SAT of *Pdgfr $\beta$ -Cre; mT/mG* mice fed HFD for 1 week, 1 month or 7 months starting at week 8 of age. (E) Frequency of mG<sup>+</sup> adipocytes in VAT and SAT of *Pdgfr $\beta$ -Cre; mT/mG* mice fed chow or HFD for 1 month starting at month 6 or 11 of age. (F) Paraffin sections of SAT from *Pdgfr $\beta$ -Cre; mT/mG* mice untreated (control), subcutaneously allografted with prostate RM1 adenocarcinoma cells (tumor) or exposed to cold (4°C) for 10 days subjected to UCP1 (red) and GFP (green) IF. UCP1 expression in adipocytes not traced with *Pdgfr $\beta$*  lineage is indicated. In all panels, scale bar=50 μm; nuclei are blue. In all graphs, plotted are mean  $\pm$  s.e.m. for multiple fields (n=10). \**P*<0.05 (Student's t-test).



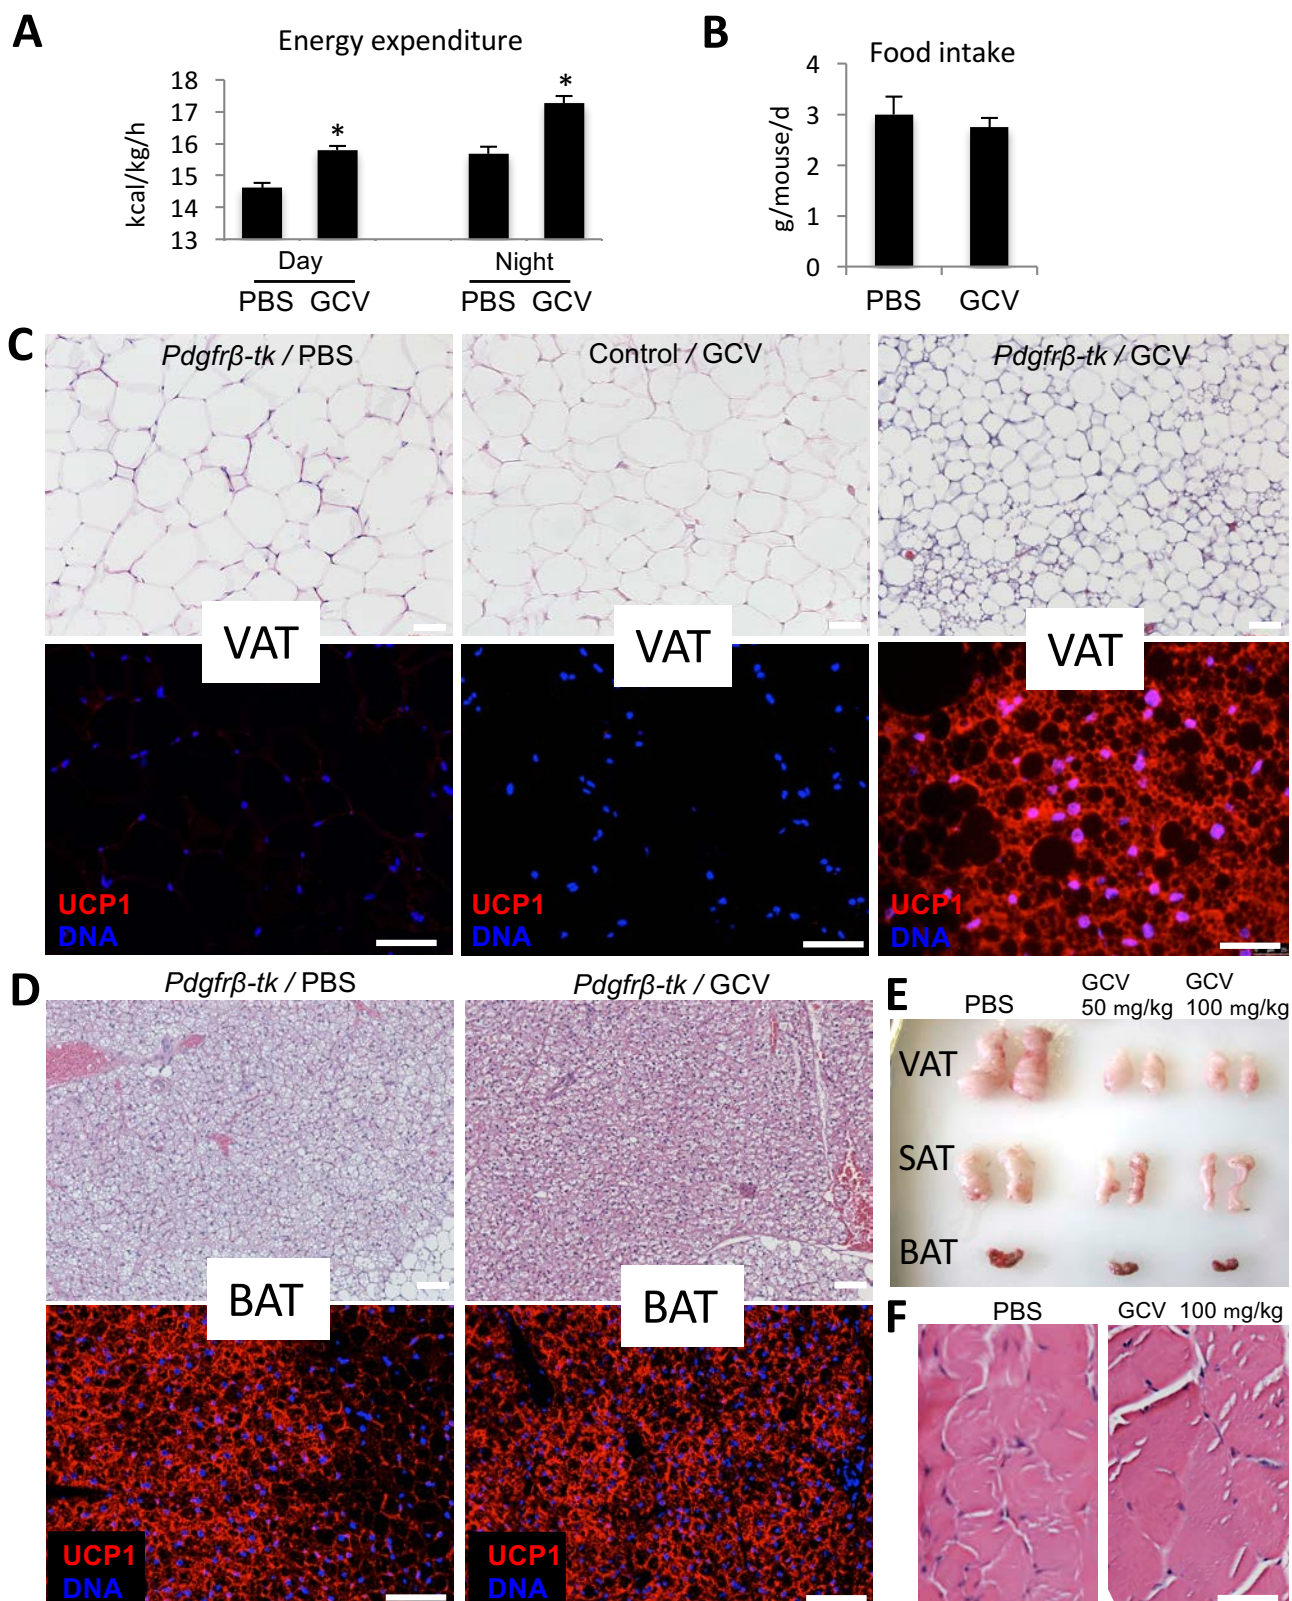

**Fig. S3. Depletion of the PDGFR $\beta$ + lineage results in AT beiging.**

(A) Heat production by *Pdgfr $\beta$ -tk* mice 1 month after GCV or PBS treatment analyzed over a 4-day/night period (mean dark and light cycle values are plotted) shows that PDGFR $\beta$ + lineage depletion results in increased energy expenditure. (B) Mean grams of food consumed per day over a 4-day/night period by *Pdgfr $\beta$ -tk* mice 1 month post GCV or PBS treatment. Plotted are mean  $\pm$  s.e.m. for multiple mice; \* $P$ <0.05 (Student's t-test) as compared to PBS. (C, D) Paraffin sections of VAT (C) and interscapular BAT (D) from *Pdgfr $\beta$ -tk* or C57BL/6 (control) mice 1 month post-treatment with PBS (control) or 100 mg/kg GCV were subjected to H/E staining and UCP1 IF (red). (E) Perigonadal VAT, inguinal SAT and interscapular BAT depots from *Pdgfr $\beta$ -tk* mice 1 month after GCV or PBS (Control) treatment. (F) H/E staining of skeletal muscle from *Pdgfr $\beta$ -tk* mice 1 month after GCV or PBS (Control) treatment showing the lack of fiber thickness reduction. Scale bar = 50  $\mu$ m; nuclei are blue.

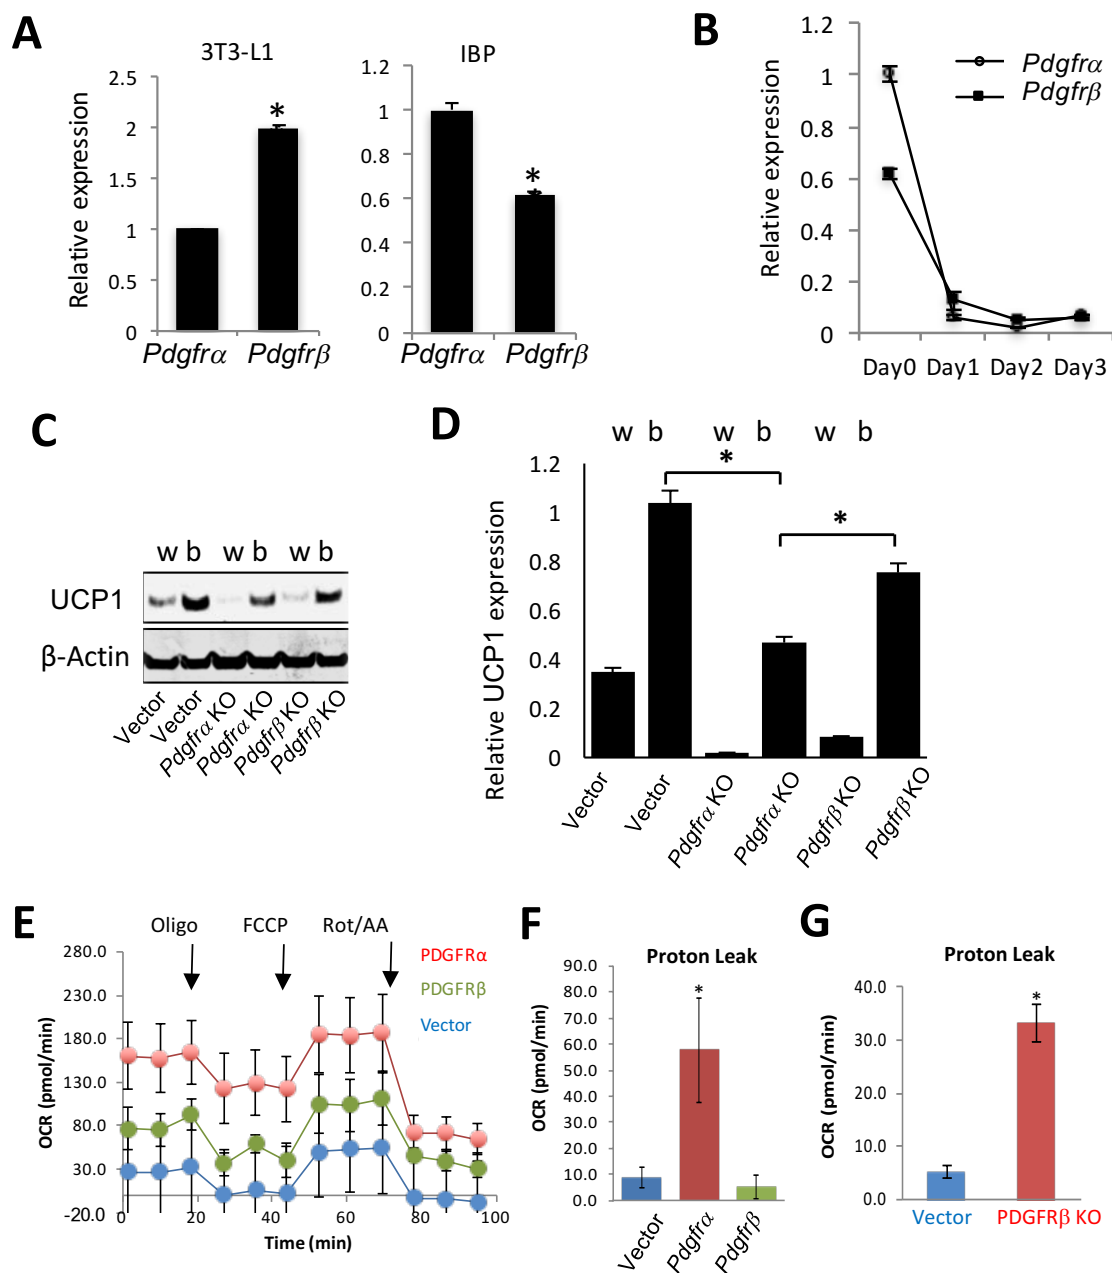

**Fig. S4. PDGFR $\alpha$  / PDGFR $\beta$  signaling controls beige / white adipocyte balance.**

(A) Quantitative RT-PCR analysis of *Pdgfra* and *Pdgfrβ* mRNA expression, normalized to 18S RNA, in 3T3-L1 cells and immortalized brown preadipocytes (IBP) grown in regular culture medium without differentiation induction. (B) *Pdgfra* and *Pdgfrβ* mRNA expression reduction in IBP over the first 3 days after white adipogenesis induction. (C) UCP1 immunoblotting of extracts from IBP KO for *Pdgfra* or *Pdgfrβ* compared to control cells transduced with CRISPR/Cas9 vector. Cells were induced to undergo brown (b) or white (w) adipogenesis for 8 days prior to analysis. (D) Quantification of data from C. Plotted are mean band intensity measurements ± s.e.m. for three samples; \**P* < 0.05 (Student's *t*-test). (E-G) Seahorse XFe24 / Flux Assay Kit was used to analyze mitochondrial respiration in 3T3-L1 adipocytes overexpressing *Pdgfra* or *Pdgfrβ* (E-F) or in 3T3-L1 *Pdgfrβ* KO cells (G). Oxygen consumption rate (OCR) was measured upon successive treatment with oligomycin, FCCP (Carbonyl cyanide-p-trifluoromethoxyphenylhydrazine) and rotenone / antimycin A. Plotted in H and I is oligomycin-resistant OCR, which reflects ATP-uncoupled respiration.

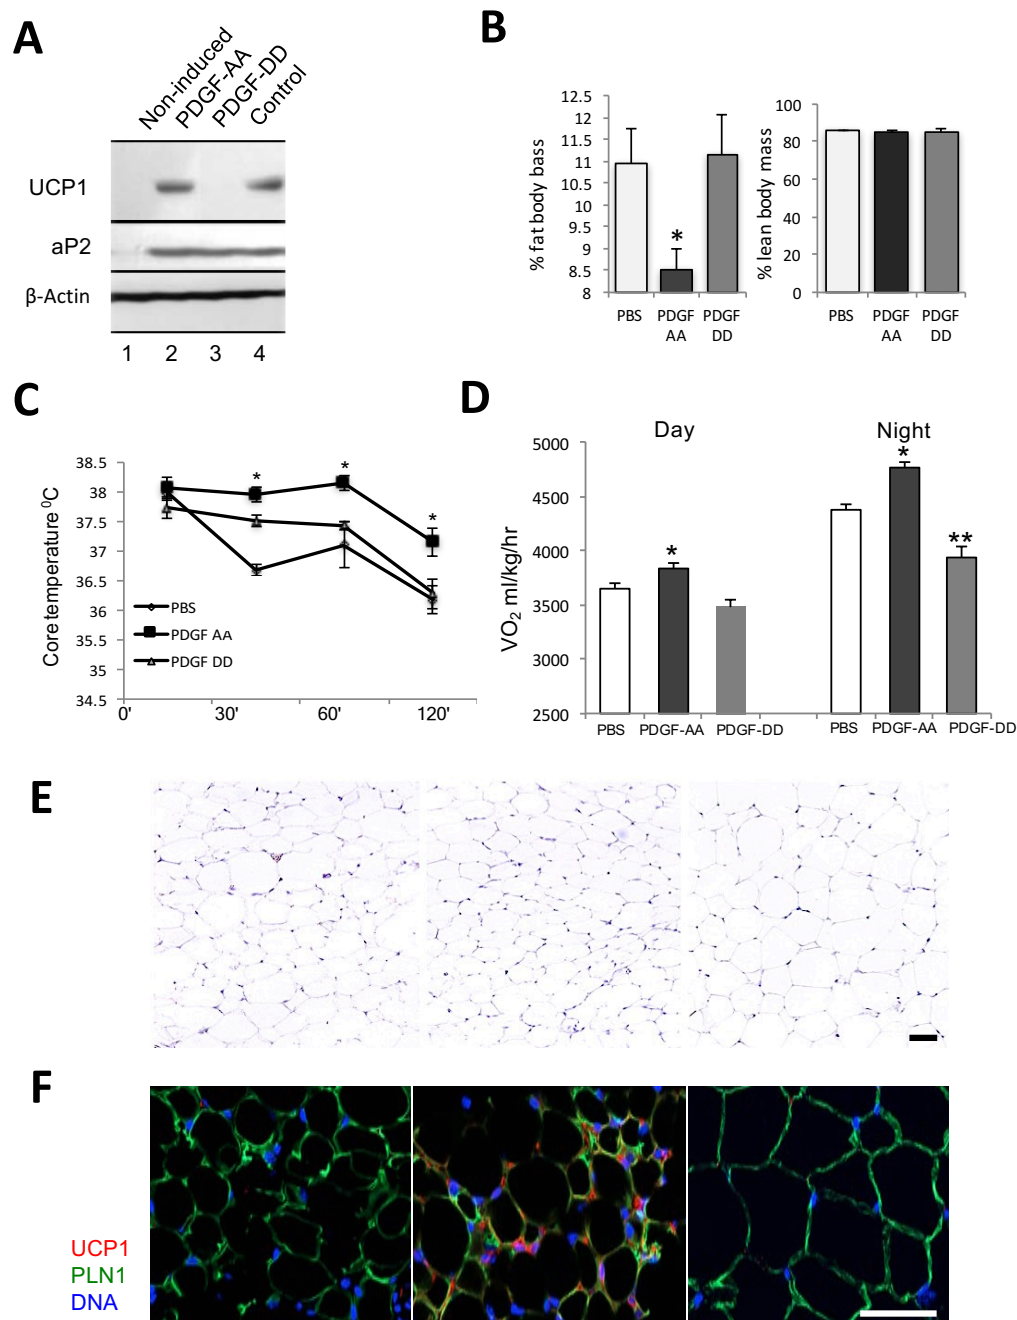

**Fig. S5. Effects of PDGF ligands on adipocyte development.**

(A) Immunoblotting of extracts from IBP grown in regular medium (1), or brown adipogenesis induction medium (2-3) supplemented with 30 ng/ml PDGF-AA, (R&D, Cat.#221-AA) 30 ng/ml PDGF-DD (R&D, Cat.#1159-SB/CF), or not supplemented (4). Adipogenesis is confirmed by aP2 immunoblotting. Note UCP1 expression absence upon PDGF-DD treatment. (B-F) Data from mice treated with PDGF-AA (R&D, Cat.#221-AA) or PDGF-DD; control mice were injected with PBS. (B) Fat and lean body mass measured by EchoMRI. Note reduced fat content upon PDGF-AA treatment. (C) Body temperature of treated mice measured over 120 min, at 4°C. Note increased cold tolerance of PDGF-AA-treated mice. (D) Oxygen consumption (VO<sub>2</sub>) measured in metabolic chambers over 3 days indicates increased metabolic rate in PDGF-AA-treated mice. In B-D, plotted are mean  $\pm$  s.e.m. for multiple mice; Student's t-test was used to identify  $P < 0.05$  \* increase and \*\* decrease compared to control (PBS). (E) H/E-stained paraffin sections reveal decreased VAT adipocyte size in PDGF-AA-treated mice. (F) anti-UCP1 (red) /anti-perilipin-1 (green) IF reveals UCP1 expression in VAT of PDGF-AA-treated mice. Scale bars: 50  $\mu$ m; nuclei are blue.
